# Supplementary material
Source: PubMed Central journal article supplement (PMC3177275)
Supplement: supp_pp.111.176230_176230Supplemental_data.pdf [file supp_pp.111.176230_176230Supplemental_data.pdf]

# Supplemental Data

A

|      |     |                                                             |              |                      |
|------|-----|-------------------------------------------------------------|--------------|----------------------|
|      |     | GTDAVQGI <u>FLSS</u> QPDKVHLK <b>KDPF</b> SNMDNL            | NL1          | } Conserved region   |
|      |     | <u>RLLKI</u> YNVEFSGSLEYLSDEL                               | NL2          |                      |
|      |     | <u>SLEWHK</u> CPLKSLPSSFEPD                                 | NL3          |                      |
|      |     | <u>KLVELN</u> LSESEIEELWEEIE R                              | NL4          |                      |
| 1-   | 22  | <b>PLEKLAVLN</b> <u>SDCQ</u> <b>KLIK</b> TPDF               | <b>LRR1</b>  |                      |
| 23-  | 46  | <b>DKVPN</b> <u>LEQL</u> <b>ILKG</b> CTSLSPDDI              | <b>LRR2</b>  |                      |
| 47-  | 69  | <u>.NLRSL</u> TN <u>FILSG</u> CSKLKKLPEIG                   | <b>LRR3</b>  |                      |
| 70-  | 92  | <b>EDMKQ</b> <u>LRKLHL</u> . <u>DGTAIE</u> ELPTSI           | <b>LRR4</b>  |                      |
| 93-  | 116 | <b>KHLTGL</b> <u>LILLN</u> <u>LRDCK</u> <b>NLLS</b> LPDVI C | <b>LRR5</b>  |                      |
| 118- | 141 | <b>TSLSL</b> <u>QIILN</u> <u>VSGCS</u> <b>NLN</b> ELPENL    | <b>LRR6</b>  |                      |
| 142- | 164 | <b>GSLECL</b> <u>QELYAS</u> R. <u>TAIQE</u> LPPTSI          | <b>LRR7</b>  |                      |
| 165- | 188 | <b>KHLTDL</b> <u>TLLN</u> <u>LRCKN</u> <b>LLT</b> LPDVI C   | <b>LRR8</b>  |                      |
| 190- | 213 | <b>TNLSL</b> <u>QIILN</u> <u>VSGCS</u> <b>NLN</b> ELPENL    | <b>LRR9</b>  |                      |
| 214- | 236 | <b>GSLECL</b> <u>QELYAS</u> G. <u>TAISQ</u> IPESI           | <b>LRR10</b> |                      |
| 237- | 263 | <b>SQLSQ</b> <u>LGEVL</u> <u>DGCSK</u> <b>LQSL</b> PRLPFSI  | <b>LRR11</b> |                      |
| 264- | 289 | <b>RAVSV</b> <u>HNCPLL</u> <u>QGAHS</u> <b>NKIT</b> VWPSAA  | <b>LRR12</b> |                      |
| 290- | 324 | AGFSFLNRQRHDDIAQAFWLPDKHL                                   | End of exon  | } Polymorphic region |
|      |     | LWPFYQTFE                                                   |              |                      |

NL1 to NL4: repeats of the NLL motifs  
 LRR1 to 12: repeats of the LRR motifs  
 Underlined:  $\beta$ -strand predicted structure (PSIpred)  
 Bolded: LRR repeats

B

LRR5 to 7:  
 KHLTGLLILLNLRDCK**NLL**sLPDVICTSLTSLQIILNVSGCS**NLN**eLPENLGSLECLQELYASRTAIQeLPPTSI  
 LRR8 to 10:  
 KHLTDLTLLNLRCKN**LL**tLPDVICTNLSLQIILNVSGCS**NLN**eLPENLGSLECLQELYASGTAISqIPESI  
 \* \* . \* \*

. : conservative mutations  
 \* : non conservative mutations  
 Colors:  
 Blue: acid amino acids; glutamate (E), aspartate (D)  
 Pink: basic amino acids; lysine (K); arginine (R)  
 Red: the more hydrophobic non polar amino acids : leucine (L), isoleucine (I), valine (V), methionine (M), phenylalanine (F), proline (P)  
 Green: other polar or non-polar amino acids

**Supplemental Figure S1.** Alignments of repeats in the NLL (NL1 to NL4) and LRR (LRR1 to LRR12) exons in TNL1 (A) and duplication of the LRR repeats 5 to 7 and 8 to 10 (B).

```

PL3      -----GTGGATCCTGATGCTTTCTTATATTTTGCAGGACTTTGAACAGGACTTG
PL4      -----CTGACACCTTGTCTCTCCCTTACAGAACCTTTGGTTGTACACT
PL5      CAAACATATATAACACCTTGACACCTTGTCTCTCTTTTACAGGACTTTGATCGTCACTCC
          ***   ***   * *   * * * * * * * * * *   **

PL3      AAATATAATTCTTGTTTCCCTCCAAATGAGATTGTAGAGTGGTTCGGGCATCAAAGCAGT
PL4      ATGTATAATTCTTGTTTCCCTTCAAGCATCACTCTGGAGTGGTTTGGGGATCAAAGCAGT
PL5      ATGTATAACTCATGTTTCCCTTCAAGCATAACTCTAGAGTGGTTCGGCCATCAAAGCAAT
          *   * * * * * * * * * * * * * * * * * * * * * * * * * * * * *

PL3      GGCCCTCTGTAAAAATCCCTCTACCATCAAATCTATGTGAGACACCAACTGGATAGGA
PL4      GGCTCCTCGATAAGAGTCCCCTACCACCACATTTATATAGAGCCACTAATTGGATAGGA
PL5      GACTCCTCGGCAACAATCTCGCTACCACATAATCTAAACTTAGACAGCAATTGGATAGGA
          * * * * * * * * * * * * * * * * * * * * * * * * * * * * *

PL3      CTGGCTTTATGTGCATACTTTTCAGTCCCTGACCACTCAACTATTGACCTTGAGAATTTG
PL4      TTGGCTTTATGCACATCCTTTTCAATCGTGGATAATCCAACCTGCTGACCTAGACAATTTG
PL5      TTAGCTGTATGTGCATACTTTTCAGTCCCTGGAGCATCCAACCTGTCGACATTGACAATTTG
          * * * * * * * * * * * * * * * * * * * * * * * * * * * * *

PL3      AAT---CCTGAAATTTCTCACACCTTACATGTCTATTGGAACCTGATGAAAGTTGCTCTG
PL4      AAT---CCAGAAATTTCTCACCACCTTAATATGTCACTTGGAGTCGGACAGAGGTACAATA
PL5      GATATTCAGCAATTTCTCACCACCTTATATGTAATTTGGAATCAGATAGAGACAGTCTA
          **   ** * * * * * * * * * * * * * * * * * * * * * * * * *

PL3      GAATCCCTCCATGGCTATAGCACCAACAGTCAAGAATTCAAGTGGTGTATCGTATGGGA
PL4      GAACCTCTCCATGACTACTGCACCACCAACGAAGAATTCCAATGGTGCCTTTT---GGA
PL5      GAATCTTTGATGACTACTGCACCACAAAGGAAGAATTCTATGGTGCATCTC---GGA
          *** * * * * * * * * * * * * * * * * * * * * * * * * * * *

PL3      GGATTCATTTGGCTGTCTATATACCACGATGCTGGTTTTTCAGATCAGTTGAAAGAACGA
PL4      GGATTCATTTGGGTATCCTACATACCACGAGCGTGGTTTTTCAGATCAGTTGAATGAATGT
PL5      GGATTCGTTTGGGTATCCTATATACCACGAGCGTGGTTTTTCAGATCAGTTGAATGAATGC
          ***** * * * * * * * * * * * * * * * * * * * * * * * * * * *

PL3      GGCCACCTGGAGGCTTCAATTGGAAGCGATCATGGAAGCTTGGGTGTGCATAGGTGTGGG
PL4      GATGTCCTGGAGGCTTCAATTTGCAAGCGATCATGAAGCATTACTGTGCACGAGTGTGGG
PL5      GGTGTACTAGAGGCTTCAATTGCAAGCGATCATGAGGCCTTTAGTGTGCAAAAGTGTGGG
          *   ** * * * * * * * * * * * * * * * * * * * * * * * * * *

PL3      CTTCGTCTTATATATCTGGAAGATGAGGAAGGGCTTAAGGAGACCATAATGCACTGCATG
PL4      CTACGTCTTGTATATCAGCATGACGAGGAAGAGATTAAGCAGACCATATTGCACTATATG
PL5      CTCCGTCTTGTATATCAGCATGATGAGGAAGAGTTTAAGCAGACCATATC-----
          ** * * * * * * * * * * * * * * * * * * * * * * * * * * *

PL3      ACCTCCTTGTGAGATATTAATCAAGGAAAAGATGAGCAATACCAGAACTGCGAGGCAGGA
PL4      ACGTCGTTGTGAGAT---AAGAAAGGAAAAAATAAGCAATGCCCATGGGTGACACGGGA
PL5      ---TCGTTCTCAGAT---AAGAAAGGAAAAAATAAGCAACCCCTCACTGC-----
          ** * * * * * * * * * * * * * * * * * * * * * * * * * * *

PL3      TCATCTAGTATAACTGGCAGCAACATTGTAATCCTGTAATCCCCATCTTGAAGATCA
PL4      TCATCTAGTAGGCCTAGCAGCTATATGTGAAACCT-----CATCTCGAAAGATTA
PL5      CCGCTGAACAGGAT---CAATGACACT-----AAGGGT---
          *   * * * * * * * * * * * * * * * * * * * * * * * * * *

PL3      GAGGAGCCCAATGATAAGAAATGGGTACGATT--
PL4      GGAAGGCCTAGTGATGAGAAATGGGTATGACTCG
PL5      ---AAC-----TAAGTACTGGA-ATAA----
          *   * * * * * * * * * *

```

**Supplemental Figure S2.** Sequence alignment (ClustalW 1.8) of the PL3 to PL5 exons from TNL1 illustrating that these three exons derived from ancient duplications. Similarities between PL3 and PL4, PL3 and PL5 and PL4 and PL5 are respectively 73, 75 and 80%.

TNL1 R : GAGAAAG~AAATAATTATAGACATACCAACAAAGTCTGAGGAACC  
Parsley D-box : TACAATTCAA~CATTGTT~~~~~CAAACA~~~AGGAACC

**Supplemental Figure S3.** Comparison of the putative D-box from the TNL1 allele (position -3251 bp from ATG) and from the parsley *PR2* promoter as given by Rushton et al. (2002). The six base pairs critical for inducibility strength are underlined.

**Supplemental Table S1.** Primers sequence, product size and position of markers of the Ma1 gene on the sequence of BAC 76H19 (287,717 bp).

The position corresponds to the first base of the forward (F) primer.

| Marker name | F and R primer sequences (5' → 3')                     | Product size (bp) | Position on BAC 76H19 |
|-------------|--------------------------------------------------------|-------------------|-----------------------|
| SCAFLP3     | GCAAAACCAGCCTCTGTCTC<br>TCAGCACGTAATCTAAAGGTGG         | 506               | 3,788                 |
| SSR6        | ATGGTAGCCACTTATGGAGC<br>TTGACCTATAAAGTGATGGAAGG        | 402               | 45,096                |
| SSR2        | CCACCTCCCATCTAGAACTCC<br>GCTAAAGTCGGCAAAGTCCA          | 323               | 107,413               |
| PErepin     | CACAGCTTGAACTCTTGAAGG<br>AGAATTGCATTTTGGTGTCTCC        | 217               | 123,154               |
| SSR1        | GATTGTGAGAGTCCGTTTTCTTT<br>ACCATCCAATGGCATCTCA         | 156               | 126,470               |
| NSCAFLP2    | AAAGGGGAAAACCCAAATTTAC<br>GGTCCTTTATTAGTGAATCTCTCC     | 327               | 132,620               |
| SCAFLP2     | GGACCCTGTACTACTATTAGTAAT<br>TTAGAAGGGTGCACGTTGAGAGGCCG | 202               | 132,941               |
| DebNBS      | GAGGCCGGAATCTAACTACAAGT<br>TTTTCTTCTCACCAGAGTAGCCT     | 907               | 133,136               |
| Int2        | AGGCTACTCTGGTGAGAAGAAAA<br>AATTGAATAAAAAACATTT         | 496               | 134,020               |
| SSRO5I5     | GAGCACATTCAAATAAAATAACA<br>TTTCATCACGCCGAATGGCAT       | 283               | 135,856               |
| SSRO5I12    | AGCCACTGCTTTGATCCCCA<br>CATCTTGAAAGATCAGAGGA           | 216               | 138,386               |
| CT3-4N      | TCTTGTATATCAGCATGACGAGG<br>GCTAATCCTATCCAATTGCTGTC     | 458               | 138,957               |
| PostGC3     | ACAGGGTTAAAACCACGTAA<br>GGACAGGTTGCATGTTAGAT           | 388               | 154,620               |
| SSR9        | CCATATTCAAACCTTTCACCG<br>ACAACGGTGTGGCCTTCAGG          | 267               | 156,716               |
| plgms19     | CGGGGTTCAAACCTCAACAAG<br>GTGAACAAAGCAGCACGTCT          | 327               | 172,659               |
| SCAFLP4     | TTCTCATATGGGCCATCTCCA<br>TACGCCTCCTCTCCTGGAAATA        | 316               | 177,477               |
| SSR12       | GAACTAAAATCGAACTCAGATGC<br>GATCTGTGAATACCAAGGGTG       | 324               | 254,593               |

**Supplemental Table S2.** Resistance phenotype and genotype to RKN *Meloidogyne* spp. of material used (1) as parents for Ma high resolution mapping and (2) for complementation experiments.

| Species                                 | Accession                                                              | Resistance status to... |                     |                    |                       |                       | Genotype       |
|-----------------------------------------|------------------------------------------------------------------------|-------------------------|---------------------|--------------------|-----------------------|-----------------------|----------------|
|                                         |                                                                        | <i>M. arenaria</i>      | <i>M. incognita</i> | <i>M. javanica</i> | <i>M. floridensis</i> | <i>M. mayaguensis</i> |                |
| Myrobalan plum ( <i>P. cerasifera</i> ) |                                                                        |                         |                     |                    |                       |                       |                |
|                                         | P.2175 (1) (2)                                                         | R <sup>a</sup>          | R                   | R                  | R                     | R                     | <i>Ma1 /ma</i> |
|                                         | P.2646 (1)                                                             | S <sup>a</sup>          | S                   | S                  | S                     | S                     | <i>ma/ma</i>   |
|                                         | P.2032 (2)                                                             | S                       | S                   | S                  | S                     | S                     | <i>ma/ma</i>   |
| Peach ( <i>P. persica</i> )             |                                                                        |                         |                     |                    |                       |                       |                |
|                                         | P.3443 (1)                                                             | S                       | S                   | S                  | S                     | S                     | <i>ma/ma</i>   |
|                                         | Nemared (1)                                                            | R                       | R                   | R/S <sup>a</sup>   | S                     | - <sup>a</sup>        | <i>ma/ma</i>   |
| Almond x peach                          |                                                                        |                         |                     |                    |                       |                       |                |
|                                         | (Garfi x Nemared) <sub>22</sub> (1)                                    | R                       | R                   | R/S                | S                     | -                     | <i>ma/ma</i>   |
| Myrobalan x (almond x peach)            |                                                                        |                         |                     |                    |                       |                       |                |
|                                         | [P.2175 x (Garfi x Nemared) <sub>22</sub> ] <sub>253</sub> = '253' (2) | S                       | S                   | S                  | S                     | S                     | <i>ma/ma</i>   |

<sup>a</sup>R = resistant, S = susceptible, R/S = resistance depending on the RKN species population, - = unknown

**Supplemental Table S3.** Primers used for the cDNAs of TNL1 (full-length construction), TNL2 and TNL3.

| TNL      | Primer name | Sequence 5'-->3'                   | Target region                  |
|----------|-------------|------------------------------------|--------------------------------|
| TNL1     | Am5'-2F     | CAC TTG TAA GTA CCT TTC AAA AGC    | 5' UTR                         |
|          | TIRGC1-R1   | GTT TGC CAG TTC GAC CAT TTT CG     |                                |
|          | TIRGC1-R2   | CAA ATC CTT CGG CTT CGA GTT CGG    |                                |
|          | TIRNBSGC1-F | CGA ACT CGA AGC CGA AGG ATT TG     | TIR-NBS                        |
|          | TIRNBSGC1-R | GTC CTT TAA ATC ATC ATT TGA GAA TG |                                |
|          | NBSGC1-F    | CTC AAA TGA TGA TTT AAA GGA CT     | NBS-NLL                        |
|          | NBSNLLGC1-R | AGG AAA ATA CCT TGG ACA GCA TC     |                                |
|          | EpisLRR-F1  | TAC CTG AAA GCA TCT CTC AGC        | LRR-PL2                        |
|          | EpisLRR-R1  | GCA GAG CAC AGA CAA CGT AG         |                                |
|          | CT3-Fo      | AGC AAC ATT GTA AAT CCT GTA AAT C  | PL3-PL5                        |
|          | CT3-Ba      | CGA TCA AAG TCC CAT TTC TCA TC     |                                |
|          | Ic-CT3-Ba   | GAT GAG AAA TGG GAC TTT GAT CG     | 3' UTR                         |
|          | TNL2        | NBSGC2-F                           | AAA TGA GTT TGT GTA TGG ATT CG |
| NBSGC2-R |             | GTA TAT TTC TCG GTG GTT GTA AT     |                                |
| TNL3     | NLR-F2      | CTG CCT TCA AGT TTT GAA CCC GAT    | NLL-LRR                        |
|          | NLR-R       | TCA GCT TAG AGG GCA AGG CCG GTC    |                                |
